# Supplementary material for: Targeted Metabolomic Analysis of a Mucopolysaccharidosis IIIB Mouse Model Reveals an Imbalance of Branched-Chain Amino Acid and Fatty Acid Metabolism
Source: Int J Mol Sci. 2020 Jun 12;21(12):4211. doi: 10.3390/ijms21124211 (PMC7352355; doi:10.3390/ijms21124211)
Supplement: Supplementary file 1 [file ijms-21-04211-s001.xlsx]

## Sheet: Table S1
Supplemetary Table 1. Heart metabolite concentrations (µM)
	Ala	Val	Xle	Met	Phe	Tyr	Asp	Glu	Gly	Orn	Cit	Arg	C0	C2	C3	C4	C5	C6	C8	C10	C12	C14	C16	C18	C5:1	C6:1	C8:1	C10:2	C10:1	C12:1	C14:2	C14:1	C16:1	C18:1	C18:2	C4-OH	C5OH	C6OH	C12-OH	C14-OH	C16OH	C18OH	C3DC	C4DC	C5DC	C6DC	C8DC	C10DC
WT1	128.697	23.86	31.3416	8.23097	9.32334	4.11091	96.0919	339.536	53.8471	4.22859	13.8876	22.1161	34.9418	6.19981	0.0461984	0.0067527	0.0153995	0.0072468	0.00337635	0.00387045	0.00387045	0.0051057	0.00485865	0.006588	0.00222345	0.0072468	0.0052704	0.00238815	0.0014823	0.00255285	0.00387045	0.0029646	0.00354105	0.00485865	0.0039528	0.0031293	0.011282	0.004941	0.00387045	0.00436455	0.0013176	0.0039528	0.00387045	0.00963496	0.00436455	0.0021411	0.0042822	0.0258579
WT2	160.602	28.8589	42.701	10.7663	11.4219	5.50905	118.689	414.238	66.1037	4.9723	18.1696	27.9303	47.5884	7.98096	0.0517158	0.00856441	0.0134231	0.00601155	0.00856441	0.0080703	0.00502335	0.00321165	0.00815265	0.00387045	0.0019764	0.00749385	0.00271755	0.0042822	0.0042822	0.00271755	0.0064233	0.0054351	0.0052704	0.0042822	0.00387045	0.0044469	0.0124349	0.00551745	0.0041175	0.00765855	0.0042822	0.00238815	0.00321165	0.0150701	0.0059292	0.00139995	0.00321165	0.0258579
WT3	180.031	31.7949	46.5673	12.289	13.2408	6.27878	134.687	468.487	75.2454	5.78081	20.8139	31.9748	58.2956	10.5486	0.0783972	0.0077409	0.0208346	0.00650565	0.00897616	0.00617625	0.00419985	0.0036234	0.0055998	0.0039528	0.00419985	0.0118584	0.00551745	0.0102938	0.0069174	0.00518805	0.00732915	0.0067527	0.0111996	0.00502335	0.0044469	0.00419985	0.0130937	0.0077409	0.0057645	0.00337635	0.00502335	0.0039528	0.0069174	0.0172112	0.00617625	0.0062586	0.0031293	0.0408456
WT4	4.07576	4.1577	1.07117	0.530039	0.535246	0.34345	0.439122	2.73636	5.03322	0.64314	0.0337264	0.0961993	0.383062	0.125851	0.00739414	0.0074696	0.00211261	0.00181081	0.00188626	0.000829955	0.00128266	0.000603604	0.00135811	0.000603604	0.000452703	0.00135811	0.00150901	0.000679054	0.00165991	0.000754505	0.00105631	0.000603604	0.000603604	0.000603604	0.000754505	0.00165991	0.00181081	0.000905405	0.00143356	0.000905405	0.000603604	0.000603604	0.00135811	0.00150901	0.00203716	0.00128266	0.000603604	0.0276903
WT5	2.60576	3.12146	0.797813	0.454966	0.531398	0.382383	0.461002	2.33723	4.92805	0.749525	0.0448176	0.132416	0.310177	0.127436	0.00679054	0.00845045	0.00241441	0.00362162	0.00233896	0.00128266	0.00105631	0.00120721	0.00113176	0.00128266	0.00113176	0.00173536	0.00165991	0.00128266	0.00105631	0.00120721	0.00135811	0.000754505	0.000829955	0.000679054	0.000528153	0.00128266	0.00301802	0.000980856	0.00105631	0.000528153	0.000452703	0.000301802	0.00143356	0.00324437	0.000905405	0.00165991	0.000603604	0.0297275
WT6	0.733907	4.13544	0.29901	0.183797	0.0800529	0.0841273	0.206432	0.491711	1.03412	0.142677	0.0189381	0.027464	0.0656419	0.0222579	0.00603604	0.00437613	0.000754505	0.00203716	0.00196171	0.000679054	0.000829955	0.000679054	0.000980856	0.000603604	0.00135811	0.00248987	0.00113176	0.00135811	0.000829955	0.000528153	0.00165991	0.000829955	0.000829955	0.000603604	0.00113176	0.00135811	0.000603604	0.000603604	0.000528153	0.000452703	0.000301802	0.000452703	0.00150901	0.00233896	0.000829955	0.000829955	0.000829955	0.0374234
WT7	223.789	36.8377	50.3874	44.7659	14.2359	16.3344	91.0882	399.271	76.4722	5.57367	20.8069	34.1124	41.2735	13.3158	0.101681	0.302574	0.0616314	0.0409087	0.0246955	0.0211522	0.0141731	0.00708654	0.00966346	0.00579808	0.012133	0.00461699	0.00483173	0.00300641	0.0133141	0.00998558	0.0049391	0.0127772	0.00644231	0.00386538	0.00708654	0.372365	0.0812804	0.0432708	0.0206154	0.0110593	0.008375	0.00193269	0.189511	0.739899	0.0331779	0.0106298	0.00569071	0.0523974
WT8	230.039	36.7238	52.1042	46.1017	14.6123	16.911	93.8703	434.975	78.0379	5.11777	21.0963	34.9451	41.9882	13.7083	0.100178	0.317391	0.0529343	0.0491763	0.0275946	0.0179311	0.0109519	0.00794551	0.00429487	0.00483173	0.00751603	0.00483173	0.00644231	0.00450962	0.0109519	0.00848237	0.00612019	0.00612019	0.00601282	0.00429487	0.00300641	0.379559	0.0740865	0.0361843	0.0237292	0.0139583	0.00547596	0.00246955	0.217428	0.850492	0.0397276	0.00429487	0.00612019	0.0448814
WT9	256.613	41.9144	59.0404	59.5236	16.2344	19.5448	108.972	482.1	85.7197	5.56079	24.0791	39.0456	48.8904	13.8136	0.136899	0.366997	0.0483173	0.0565849	0.0250176	0.0155689	0.0133141	0.00665705	0.00869712	0.00601282	0.0143878	0.00558333	0.00869712	0.00622756	0.00751603	0.00601282	0.00794551	0.00665705	0.00536859	0.00794551	0.00332853	0.410053	0.0709728	0.0394054	0.0298494	0.0159984	0.00601282	0.00397276	0.225481	0.865095	0.0312452	0.00601282	0.00730128	0.0465994
NAGLU -/- 1	119.439	32.0038	47.6359	26.3765	17.5336	14.3609	141.391	247.691	61.98	5.74067	14.2423	32.9918	41.8325	13.3172	0.197663	0.355322	0.0301628	0.0447095	0.00652458	0.0051341	0.00492018	0.00331577	0.0062037	0.0062037	0.013584	0.00684547	0.00470626	0.00278097	0.0056689	0.00705939	0.00331577	0.00492018	0.00310185	0.01091	0.00363665	0.276814	0.0982966	0.0330508	0.00705939	0.00470626	0.0062037	0.00524106	0.186539	0.439714	0.00802203	0.00759419	0.00438538	0.0379709
NAGLU -/- 2	179.597	48.4931	72.8318	42.3415	24.9683	21.7433	215.932	360.807	88.3103	8.30366	21.7684	47.9711	65.8818	19.1131	0.226435	0.641549	0.0527315	0.0448164	0.0121935	0.00898467	0.00556194	0.0062037	0.00577586	0.00834291	0.024387	0.0171137	0.00898467	0.00449234	0.00385057	0.00748723	0.00438538	0.00502714	0.00449234	0.0114448	0.00385057	0.45533	0.148889	0.054015	0.0130492	0.00705939	0.00705939	0.00449234	0.323876	0.758563	0.0231034	0.00556194	0.00748723	0.0415006
NAGLU -/- 3	207.747	53.511	84.2147	52.5137	29.0224	23.7286	248.594	441.486	100.625	9.53231	25.0877	55.3416	73.6506	23.8311	0.233708	0.699842	0.0736957	0.0597909	0.0143327	0.0101612	0.00855683	0.00727331	0.00684547	0.00962644	0.0225686	0.0126213	0.00951948	0.00481322	0.00481322	0.00791507	0.00598978	0.00524106	0.0040645	0.00823595	0.00481322	0.525817	0.186539	0.0604326	0.0139049	0.00887771	0.00684547	0.00481322	0.383025	0.949167	0.0218199	0.00855683	0.00855683	0.0444955
NAGLU -/- 4	94.2667	24.3704	35.8357	9.76271	13.0022	10.4892	33.8004	175.201	46.6589	2.44788	9.28022	14.785	40.2156	11.4599	0.204666	0.634005	0.0617766	0.0738306	0.0211782	0.0139793	0.00878935	0.00661294	0.00326462	0.00326462	0.0136444	0.00560845	0.00251124	0.0030972	0.00468766	0.00343203	0.00560845	0.00468766	0.00133933	0.0041017	0.00159045	0.274981	0.0974363	0.0294653	0.0147326	0.00569215	0.00435282	0.00242754	0.238568	0.43319	0.0261169	0.0041017	0.00535732	0.0292141
NAGLU -/- 5	115.754	28.4295	42.0973	11.8075	15.762	12.9179	39.2706	207.414	53.8976	2.64183	11.4069	16.6658	49.7219	14.5032	0.28511	0.762414	0.0593491	0.0712356	0.0197551	0.00987756	0.0107146	0.00686407	0.00611069	0.00385057	0.0204248	0.00435282	0.00493878	0.00259495	0.00468766	0.0051899	0.00485507	0.00585957	0.0051062	0.00418541	0.00452024	0.267782	0.11761	0.0279585	0.0143141	0.00711519	0.00418541	0.00226012	0.221492	0.448759	0.0250287	0.00652923	0.00552474	0.0357434
NAGLU -/- 6	137.282	33.2351	49.3202	13.2187	18.15	14.7289	47.3702	235.78	60.8197	3.19698	13.1551	19.6064	56.4981	16.2501	0.35057	0.895259	0.0864705	0.0933346	0.0333995	0.0218478	0.00837081	0.00971014	0.00393428	0.00326462	0.0195877	0.00753373	0.00385057	0.0030972	0.00552474	0.00611069	0.00552474	0.00385057	0.00585957	0.00585957	0.00359945	0.355592	0.142053	0.0377524	0.0190017	0.00753373	0.00912419	0.00226012	0.317254	0.564277	0.0288793	0.00711519	0.00552474	0.03499
NAGLU -/- 7	172.361	40.9251	67.1808	19.2936	20.9953	17.9442	49.9005	347.445	67.3703	5.32171	13.4264	20.4583	60.2593	6.5948	0.104362	0.4601	0.0938672	0.0528108	0.0156165	0.0107469	0.00419799	0.00319048	0.00554135	0.00277068	0.0172957	0.0113346	0.00965539	0.00537343	0.00537343	0.00419799	0.00528947	0.00369423	0.0033584	0.00386215	0.0033584	0.0118383	0.0754799	0.0102431	0.00419799	0.00663283	0.00940351	0.00218296	0.159272	0.392932	0.00864787	0.002099	0.0162882	0.0444148
NAGLU -/- 8	144.786	39.1714	55.2547	17.0629	19.9119	18.1988	46.7212	284.15	68.4679	5.06832	13.6018	19.8825	53.0215	10.5008	0.123757	0.498554	0.0617105	0.0409724	0.0185551	0.00965539	0.00361028	0.00235088	0.00218296	0.00109148	0.0157845	0.00403007	0.00503759	0.00344236	0.00344236	0.00319048	0.00478571	0.00839599	0.00327444	0.00436591	0.0029386	0.00671679	0.0751441	0.00940351	0.00520551	0.00478571	0.00327444	0.00218296	0.154654	0.380758	0.00730451	0.00319048	0.00361028	0.0384536
NAGLU -/- 9	175.736	44.4334	62.319	19.1409	22.3976	20.4983	54.8793	326.077	76.971	5.87635	15.6461	22.5236	58.0829	11.1504	0.164226	0.513667	0.0825326	0.0574286	0.0177995	0.0129298	0.00638095	0.00638095	0.00235088	0.00319048	0.0216617	0.00587719	0.00444987	0.00327444	0.00327444	0.00797619	0.00764035	0.00277068	0.00235088	0.00159524	0.00277068	0.00982331	0.0907606	0.0105789	0.00562531	0.00478571	0.00319048	0.00319048	0.202595	0.447338	0.0117544	0.00361028	0.00520551	0.0486128

## Sheet: Table S2
Supplemetary Table 2. Liver metabolite concentrations (µM)
	Ala	Val	Xle	Met	Phe	Tyr	Asp	Glu	Gly	Orn	Cit	Arg	C0	C2	C3	C4	C5	C6	C8	C10	C12	C14	C16	C18	C5:1	C6:1	C8:1	C10:2	C10:1	C12:1	C14:2	C14:1	C16:1	C18:1	C18:2	C4OH	C5OH	C6OH	C12OH	C14OH	C16OH	C18OH	C3DC	C4DC	C5DC	C6DC	C8DC	C10DC
WT1	186.83	59.4806	67.2932	20.7292	27.2113	29.483	97.4639	288.153	172.229	31.5046	2.09392	4.48091	30.8314	9.26894	0.0390363	0.0124298	0.0352738	0.00698757	0.00752507	0.00893602	0.00537505	0.00779382	0.00765945	0.00584537	0.00651725	0.00873446	0.00705475	0.0150501	0.00470317	0.00584537	0.0458895	0.0116907	0.00544224	0.00947353	0.0139751	0.00698757	0.0252627	0.0278831	0.00732351	0.0121611	0.006786	0.00765945	0.0145798	0.0164611	0.00940634	0.0229112	0.00732351	0.0252627
WT2	161.685	49.6841	59.4501	19.305	24.365	26.2187	92.8459	243.182	158.984	28.0819	1.93609	4.13825	27.5894	7.37087	0.0375582	0.00839852	0.021433	0.010347	0.00853289	0.00490473	0.00477036	0.00550943	0.00490473	0.0045016	0.00765945	0.00342659	0.00490473	0.00853289	0.00571099	0.00584537	0.028555	0.00880164	0.00577818	0.00409848	0.0122954	0.00651725	0.021433	0.0313769	0.0106157	0.0127657	0.00618131	0.0118923	0.0142439	0.0150501	0.0102126	0.0102798	0.00692038	0.0357441
WT3	176.697	54.0811	62.3624	19.6811	26.1336	28.9401	96.3545	276.692	169.264	30.5649	2.05797	4.39565	29.5576	8.70268	0.0401113	0.0106157	0.0264049	0.006786	0.00745788	0.00571099	0.00356097	0.00430004	0.00705475	0.00456879	0.0056438	0.00490473	0.00571099	0.00833133	0.0039641	0.0051063	0.0458895	0.0113548	0.00248596	0.00497192	0.0141095	0.006786	0.0275471	0.0275471	0.00665162	0.00665162	0.00497192	0.00745788	0.0145126	0.0268081	0.00745788	0.016058	0.00786101	0.0278159
WT4	177.095	43.4514	50.3223	17.9742	21.4659	22.4648	50.1993	203.268	130.391	18.1369	1.26247	2.38798	18.5404	8.12503	0.02623	0.0077934	0.0179714	0.00628125	0.00831684	0.00767708	0.00907292	0.00500174	0.00471094	0.00535069	0.00343142	0.00628125	0.00703733	0.00639757	0.00540885	0.00436198	0.0172153	0.00657205	0.00250087	0.00535069	0.0122135	0.00628125	0.0310573	0.019658	0.0202977	0.0115738	0.0122135	0.00564149	0.0140165	0.015296	0.0108177	0.0106432	0.0102943	0.0257066
WT5	182.839	45.4618	52.4515	18.2386	22.278	23.8177	51.0183	208.88	134.72	19.5146	1.31941	2.54809	20.5258	8.5475	0.0231476	0.00773524	0.0209375	0.0114575	0.00709549	0.00575781	0.0120972	0.00540885	0.00599045	0.00540885	0.00424566	0.00913108	0.0077934	0.00645573	0.00442014	0.00424566	0.0166337	0.00604861	0.00430382	0.00773524	0.00715365	0.00982899	0.0314063	0.0278003	0.012388	0.0100035	0.00913108	0.00459462	0.0125625	0.0128533	0.0135512	0.012388	0.00907292	0.025125
WT6	211.972	52.463	60.2488	20.7506	24.3628	27.3222	57.8782	236.409	150.544	21.6436	1.51983	2.85111	22.2348	10.1709	0.0311736	0.0113411	0.0184948	0.00587413	0.00825868	0.00645573	0.00907292	0.00535069	0.00657205	0.00488542	0.00523438	0.00494358	0.00790972	0.0100616	0.00936372	0.00471094	0.0190764	0.0075026	0.00692101	0.00692101	0.00971267	0.00773524	0.0354193	0.0237292	0.0125043	0.0187274	0.014947	0.00657205	0.0222752	0.0132604	0.0165174	0.0115738	0.00814236	0.0357682
WT7	185.819	28.7444	34.6839	11.4989	15.1206	15.3454	30.4268	204.153	161.042	16.6184	1.39154	2.21266	25.7227	6.09907	0.0172493	0.010196	0.0156431	0.0071232	0.00481864	0.00405045	0.00328226	0.00328226	0.00495831	0.00495831	0.00446946	0.005936	0.00370127	0.00663436	0.00845007	0.00425996	0.0222076	0.00754222	0.00363144	0.00600584	0.00565666	0.00677403	0.0272358	0.0133385	0.00558683	0.010615	0.00467897	0.00663436	0.0121513	0.0118022	0.00481864	0.00719304	0.00851991	0.0312164
WT8	197.037	28.8342	36.0671	11.5824	15.249	15.6826	33.3028	200.662	164.772	16.5962	1.43526	2.23613	26.057	8.36048	0.0240234	0.0103356	0.0200427	0.0069137	0.00698353	0.00530748	0.00286325	0.00286325	0.00698353	0.00314259	0.00495831	0.00656452	0.00614551	0.00858975	0.00614551	0.0069137	0.034359	0.00817073	0.00733271	0.00558683	0.0129195	0.00495831	0.0243027	0.0187159	0.00537732	0.00872942	0.00523765	0.00942777	0.0135481	0.0147353	0.01271	0.0047488	0.00663436	0.030099
WT9	222.37	32.7427	40.3081	13.293	16.9008	17.346	36.4673	233.961	181.13	19.1965	1.6405	2.49389	28.5747	8.76622	0.0222775	0.00425996	0.0206713	0.00858975	0.00523765	0.00558683	0.00488847	0.00279341	0.00565666	0.0035616	0.00726287	0.00858975	0.00481864	0.00705337	0.00446946	0.00558683	0.0371524	0.0105451	0.00530748	0.00635501	0.011034	0.00551699	0.0240932	0.0203221	0.00523765	0.0124307	0.00956744	0.00886909	0.0104055	0.0163415	0.00817073	0.00628518	0.00523765	0.0262581
NAGLU -/- 1	310.506	119.393	123.463	61.4286	55.1851	62.7284	54.511	254.408	226.314	64.4368	6.6836	12.2183	35.9755	17.0912	0.492957	1.1629	0.261188	0.0757098	0.0946373	0.014446	0.026625	0.0227235	0.00833019	0.00875197	0.00848836	0.00848836	0.00790841	0.00790841	0.00933192	0.0085938	0.0105445	0.00706484	0.00637945	0.0119153	0.00516683	0.208149	0.108925	0.0570987	0.104127	0.0440762	0.0114935	0.00991187	0.0801912	0.145884	0.395737	0.0771333	0.0230925	0.0250433
NAGLU -/- 2	307.862	118.523	124.295	60.5214	57.7431	62.9755	51.9667	254.81	226.888	64.3189	6.80671	12.4245	39.4571	16.5001	0.455102	1.1532	0.238518	0.0675378	0.0925283	0.0244633	0.0292084	0.0216163	0.00780296	0.00701212	0.00906831	0.00790841	0.0057995	0.00490321	0.0102282	0.00722301	0.0118626	0.0097537	0.00664306	0.0156059	0.00664306	0.203404	0.11019	0.0592603	0.102071	0.0498757	0.0120735	0.00896286	0.0818784	0.129909	0.354613	0.0804548	0.024147	0.0268886
NAGLU -/- 3	355.47	145.37	143.074	74.0741	64.3852	71.4143	61.4201	302.764	260.12	74.2783	7.79168	14.3282	44.7177	17.9228	0.452993	1.28622	0.308955	0.0974316	0.100964	0.0166604	0.0287339	0.0313173	0.00732846	0.00875197	0.0085938	0.0081193	0.00664306	0.0085938	0.00906831	0.00869925	0.0100173	0.0148151	0.00690667	0.0101228	0.00458688	0.251698	0.139926	0.0577841	0.108767	0.0569932	0.0179257	0.00732846	0.0928447	0.155268	0.40006	0.0826692	0.0252542	0.0270995
NAGLU -/- 4	471.26	127.497	151.769	62.7067	65.2376	67.4759	66.3602	404.493	345.817	55.6162	4.41132	10.3944	54.4185	13.5012	0.546572	0.404117	0.119831	0.0374298	0.0471159	0.018957	0.0209634	0.0204791	0.00850991	0.00899422	0.0118309	0.0113466	0.0202024	0.0128687	0.0128687	0.0117617	0.0194413	0.00664188	0.00636514	0.00954771	0.00477385	0.0862061	0.0875898	0.0397821	0.0700857	0.0281588	0.0116925	0.00740293	0.0813631	0.125435	0.134567	0.0818474	0.0265675	0.0419269
NAGLU -/- 5	463.888	134.636	155.086	63.4027	66.5066	69.8066	70.8875	395.021	354.059	56.5051	4.83446	10.6081	54.1618	16.0266	0.507343	0.485203	0.151518	0.0458013	0.0375682	0.0195797	0.023039	0.0184727	0.0102396	0.0136989	0.0104471	0.0171582	0.0195797	0.0105855	0.0137681	0.00899422	0.0153594	0.0126611	0.00622677	0.0176425	0.0119692	0.0900806	0.110906	0.0530659	0.0695322	0.0467007	0.0148059	0.00740293	0.0978294	0.136989	0.130139	0.083923	0.023039	0.035285
NAGLU -/- 6	556.066	161.048	188.396	77.5704	76.4624	79.0298	85.0652	465.717	411.133	64.0747	5.58631	12.4416	67.3363	17.9537	0.520904	0.541729	0.150065	0.0550031	0.0457321	0.0272594	0.0377757	0.0240076	0.0130762	0.00996283	0.012246	0.013353	0.0123152	0.0116233	0.0163972	0.0217245	0.0188879	0.0131454	0.00996283	0.0156361	0.0112082	0.11395	0.106685	0.0744445	0.0938166	0.0343164	0.0150134	0.0137681	0.109176	0.17262	0.17601	0.0978294	0.0291966	0.0411658
NAGLU -/- 7	597.443	131.975	154.484	81.6342	64.8128	70.6843	112.859	545.959	454.522	101.915	5.84954	17.2309	54.5837	22.3721	0.869322	0.820052	0.264544	0.0881535	0.0545871	0.0391332	0.0255903	0.0299938	0.0101364	0.0240117	0.0141245	0.0135429	0.0132106	0.00938864	0.0160355	0.0425397	0.0142076	0.0174479	0.00756076	0.0145399	0.0138752	0.174064	0.155453	0.0616493	0.15753	0.0693762	0.0303261	0.010718	0.180378	0.203061	0.278087	0.187025	0.0304923	0.0397148
NAGLU -/- 8	552.721	122.624	144.177	71.235	61.8574	68.7735	112.191	526.25	429.52	98.2756	5.41434	16.4135	50.6105	24.0157	0.781334	0.733394	0.225992	0.0825868	0.0712872	0.0562488	0.0234301	0.0332341	0.0112165	0.0162016	0.0157862	0.00997024	0.0178633	0.00955481	0.0198574	0.0436198	0.0143738	0.0182788	0.00930556	0.0137091	0.00997024	0.149886	0.15753	0.0831684	0.175975	0.0709549	0.0205221	0.0112165	0.237209	0.265956	0.320876	0.205969	0.0273351	0.046694
NAGLU -/- 9	618.145	136.74	167.828	82.8993	66.9716	75.3839	126.672	596.145	492.383	111.789	6.24187	18.8019	54.2376	26.985	0.991125	0.838663	0.309991	0.10045	0.0731151	0.0482726	0.028249	0.0443676	0.0196081	0.0216022	0.0193589	0.0143738	0.0113827	0.0141245	0.019442	0.0470263	0.0269196	0.0248425	0.0108011	0.0182788	0.0128782	0.181541	0.15969	0.0723673	0.186859	0.0696255	0.0176141	0.0122135	0.223998	0.268199	0.352697	0.224497	0.0363083	0.0405456
